# Supplementary material
Source: JCI journal article supplement (doi:10.1172/jci174825)
Supplement: sd1 [file 1]

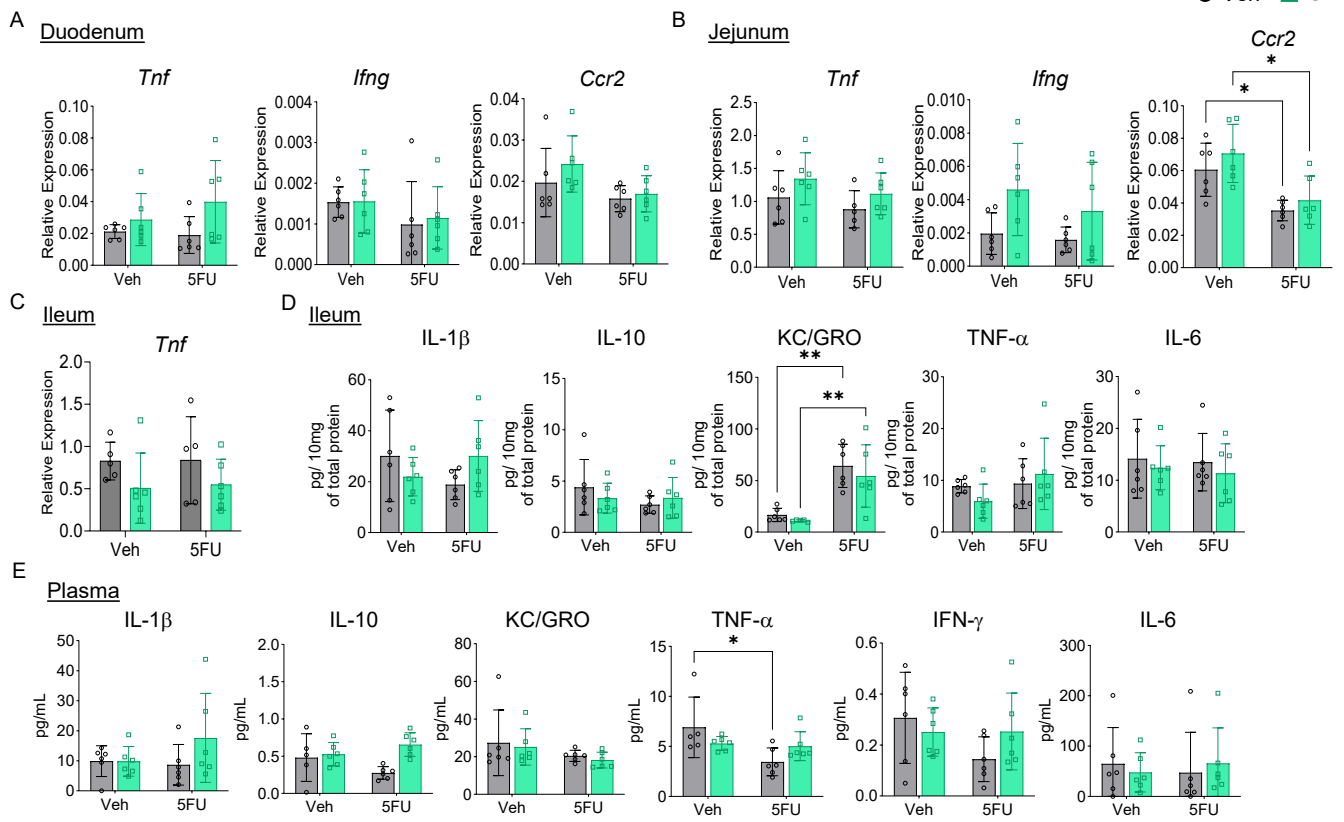

**Supplemental Figure 1: Gene and protein expression of inflammation-related markers in the small bowel and circulation of mice co-treated with [DALA<sup>2</sup>]-GIP and 5FU, related to Figure 1. (A-B) Gene expression, relative to *Tbp*, of inflammation-related markers in the (A) duodenum and (B) jejunum (n=5-6), and (C) Ileum (n=5-6). (D) Ileal protein (n=5-6) and (E) plasma concentrations of inflammation-related markers in mice exposed to [D-Ala<sup>2</sup>]-GIP and 5FU coadministration (n=5-6). Data are presented as the Mean ± SD of samples pooled from three independent mouse cohorts. \* P ≤ 0.05, \*\* P ≤ 0.01 by two-way ANOVA followed by Tukey post-hoc tests. Abbreviations: 5FU: 5-fluorouracil; *Ccr2*: c-c chemokine receptor-2; GIP: glucose-dependent insulinotropic polypeptide *Ifng*/IFN-γ: interferon gamma; IL-1β: interleukin-1 beta; IL-10: interleukin-10; IL-6: Interleukin-6; KC/GRO: Keratinocyte chemoattractant /human growth-regulated oncogene; *Tbp*: TATA-binding protein; *Tnf*/TNF-α: tumor necrosis factor alpha; Veh: vehicle.**

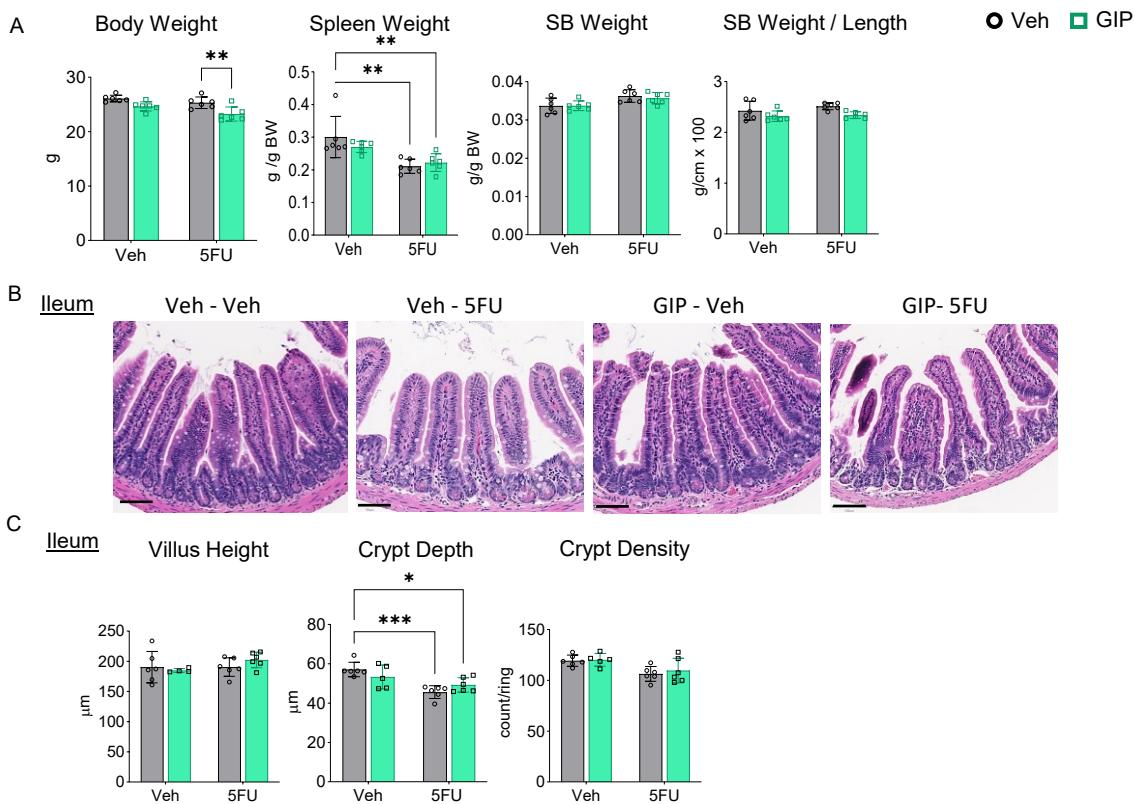

**Supplemental Figure 2: Treatment with [D-Ala<sup>2</sup>]-GIP twice daily decreases body weight of mice exposed to 5FU, related to Figure 1. (A)** Body weight, spleen and small bowel (SB) weights adjusted for total body weight, and SB weight to length ratio of mice exposed to [D-Ala<sup>2</sup>]-GIP and 5FU coadministration (n=6). **(B)** Representative histology images of the ileum using H&E staining (20x magnification, scale bar: 100µm). **(C)** Quantification of villus height, crypt depth and crypt density (n=4-6). Data are presented as the Mean ± SD of samples pooled from three independent mouse cohorts. \* P ≤ 0.05, \*\* P ≤ 0.01, \*\*\* P ≤ 0.001 by two-way ANOVA followed by Tukey post-hoc tests. Abbreviations: 5FU: 5-fluorouracil; GIP: glucose-dependent insulintropic polypeptide; SB: small bowel; Veh: vehicle

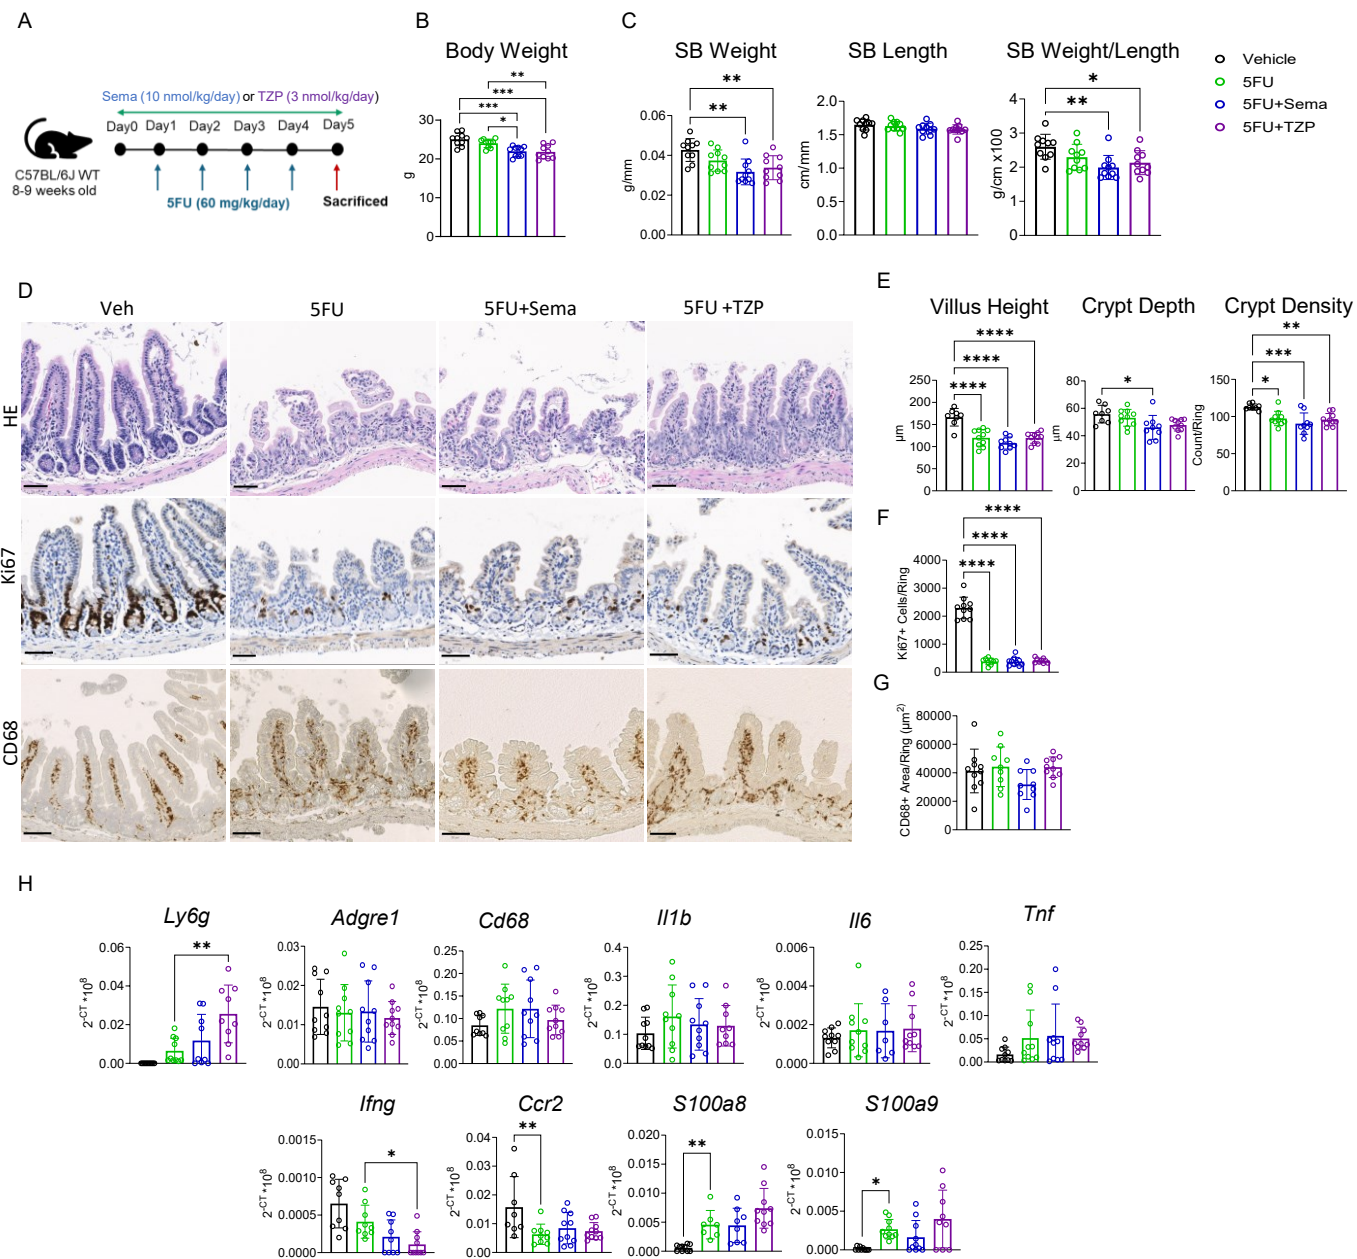

**Supplemental Figure 3: Treatment with Semaglutide or Tirzepatide does not modulate 5FU-induced gut injury, related to figure 2. (A)** Schematic representation of the experimental protocol. **(B)** Body weight **(C)** Small bowel (SB) weight and length adjusted for tibia length, and SB weight to length ratio (n=10) **(D)** Representative images for ileum stained with hematoxylin and eosin (HE), anti-Ki67, and anti-CD68 antibody (20x magnification, scale bar: 50µm). **(E)** Quantification of villus height, crypt depth and crypt density (n=8-10). **(F)** Average number of Ki67 positive cells per ring (n=9-10). **(G)** Average positive area of CD68+ signal per ring (n=9-10). **(H)** Gene expression of inflammation markers within the ileum of mice treated with Veh, 5FU, 5FU with semaglutide (Sema, 10 nmol/kg/day), or 5FU with tirzepatide (TZP, 3 nmol/kg/day) co-treatment (n=9-10). Data are presented as Mean ± SD of samples pooled from two independent mouse cohorts. \* P ≤ 0.05, \*\* P ≤ 0.01, \*\*\* P ≤ 0.001, and \*\*\*\* P ≤ 0.0001 by one-way ANOVA followed by Tukey post-hoc tests (B-C) and by Dunnett's test with 5FU as the control (E-H). Abbreviations: 5FU: 5-fluorouracil; *Adgre1*: adhesion G protein-coupled receptor E1; *Ccr2*: c-c-chemokine receptor type 2; *Cd68*: cluster of Differentiation 68; *Ifng*: interferon gamma; *Il1b*: interleukin-1 beta; *Il6*: interleukin-6; *Ly6g*: lymphocyte antigen 6 family member G; *S100a8*: S100 calcium-binding protein A8; *S100a9*: S100 calcium-binding protein A9; SB: Small Bowel; Sema: Semaglutide; *Tnf*: Tumor Necrosis Factor; TZP: Tirzepatide.

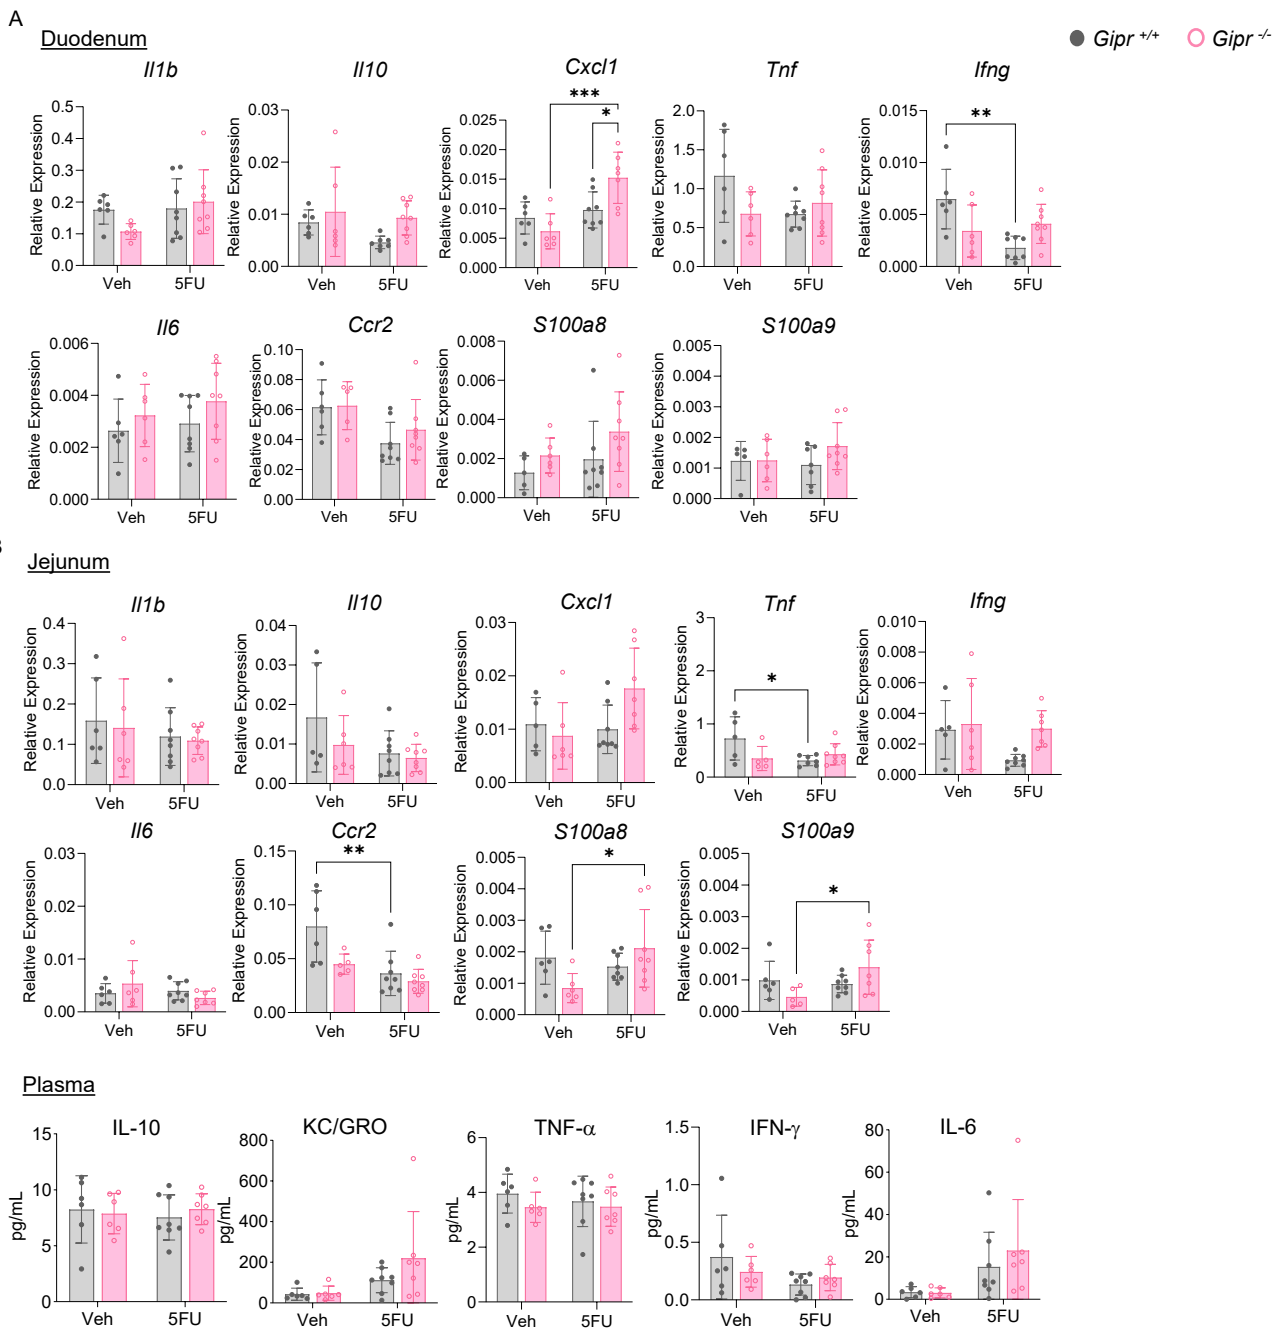

**Supplemental Figure 4: Levels of inflammation-related markers in the small bowel and circulation of *Gipr*<sup>+/+</sup> and *Gipr*<sup>-/-</sup> mice with or without 5FU exposure, related to figure 3. (A-B) Gene expression, relative to *Tbp*, of inflammation-related markers in the (A) duodenum and (B) jejunum of *Gipr*<sup>+/+</sup> and *Gipr*<sup>-/-</sup> mice with or without 5FU exposure (n=5-8). (C) Circulating cytokine concentrations (n=6-8). Data are presented as Mean ± SD of samples pooled from three independent mouse cohorts. \* P ≤ 0.05, \*\* P ≤ 0.01, and \*\*\* P ≤ 0.001 by two-way ANOVA followed by Tukey post-hoc tests. Abbreviations: 5FU: 5-fluorouracil; *Ccr2*: c-c chemokine receptor-2; *Cxcl1*: chemokine ligand 1; *Gipr*: glucose-dependent insulintropic polypeptide receptor; *Ifng*/IFN-g: interferon gamma; *I11b*: interleukin-1 beta; *I110*/IL-10: interleukin-10; *I16*/IL-6: interleukin-6; *KC/GRO*: keratinocyte chemoattractant /human growth-regulated oncogene; *S100a8*: s100 calcium-binding protein-8; *S100a9*: s100 calcium-binding protein-9; *Tbp*: TATA-binding protein; *Tnf*/TNF-a: tumor necrosis factor; Veh: vehicle.**

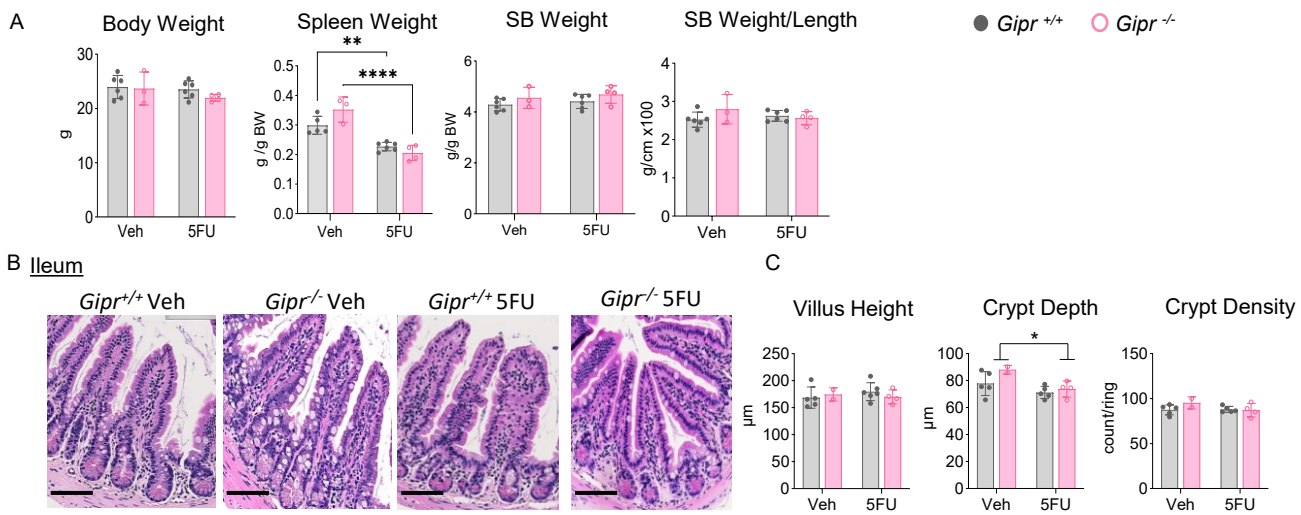

**Supplemental Figure 5: Tissue weights and gut morphology in *Gipr*<sup>+/+</sup> and *Gipr*<sup>-/-</sup> mice with or without 5FU exposure, related to figure 3** (A) Body weight, spleen and small bowel weights adjusted for total body weight, and small bowel weight to small bowel length ratio of *Gipr*<sup>+/+</sup> and *Gipr*<sup>-/-</sup> mice with or without 5FU exposure (n=3-5). (B) Representative histology images of the ileum using H&E staining at 20x original magnification (20x magnification, scale bar: 100 $\mu\text{m}$ ). (C) Quantification of villus height, crypt depth and crypt density (n=2-6). Data are presented as the Mean  $\pm$  SD of samples pooled from three independent mouse cohorts. \*  $P \leq 0.05$ , \*\*  $P \leq 0.01$ , \*\*\*\*  $P \leq 0.0001$  by two-way ANOVA followed by Tukey post-hoc tests. Abbreviations: 5FU: 5-fluorouracil; *Gipr*: glucose-dependent insulinotropic polypeptide receptor; SB: small bowel; Veh: vehicle.

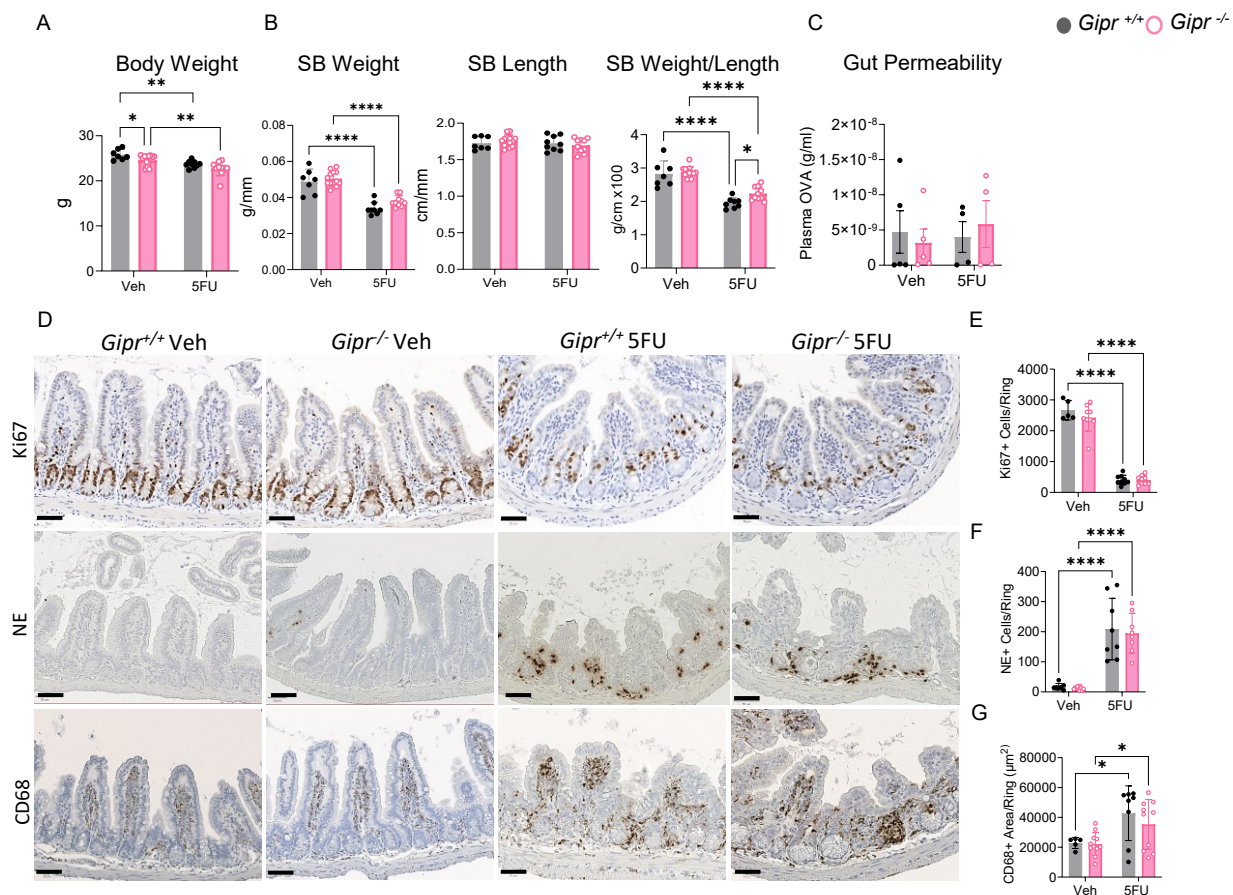

**Supplemental Figure 6: Markers of 5FU-induced gut injury in *Gipr*<sup>-/-</sup> and *Gipr*<sup>+/+</sup> mice, related to figure 4. (A)** Body weight (B) Small bowel (SB) weight and length adjusted to tibia length, and SB weight to length ratio (n=10) (C) gut permeability measured as the concentration of plasma ovalbumin 3 hours post oral ovalbumin gavage (n=5). (D) Representative images for ileum stained with anti-Ki67, anti-neutrophil elastase (NE), and anti-CD68 antibody (20x magnification, scale bar: 50 μm). (E) Average number of Ki67 positive cells per ring. (F) Average number of NE positive cells per ring. (G) Average positive area of CD68+ signal per ring. Data are presented as Mean ± SD of samples pooled from two independent mouse cohorts. \* P ≤ 0.05, \*\* P ≤ 0.01, and \*\*\*\* P ≤ 0.0001 by two-way ANOVA followed by Tukey post-hoc tests. Abbreviations: 5FU: 5-fluorouracil; CD68: cluster of Differentiation 68; *Gipr*: glucose-dependent insulintropic polypeptide receptor; NE: Neutrophil Elastase; OVA: Ovalbumin SB: Small Bowel; Veh: vehicle.

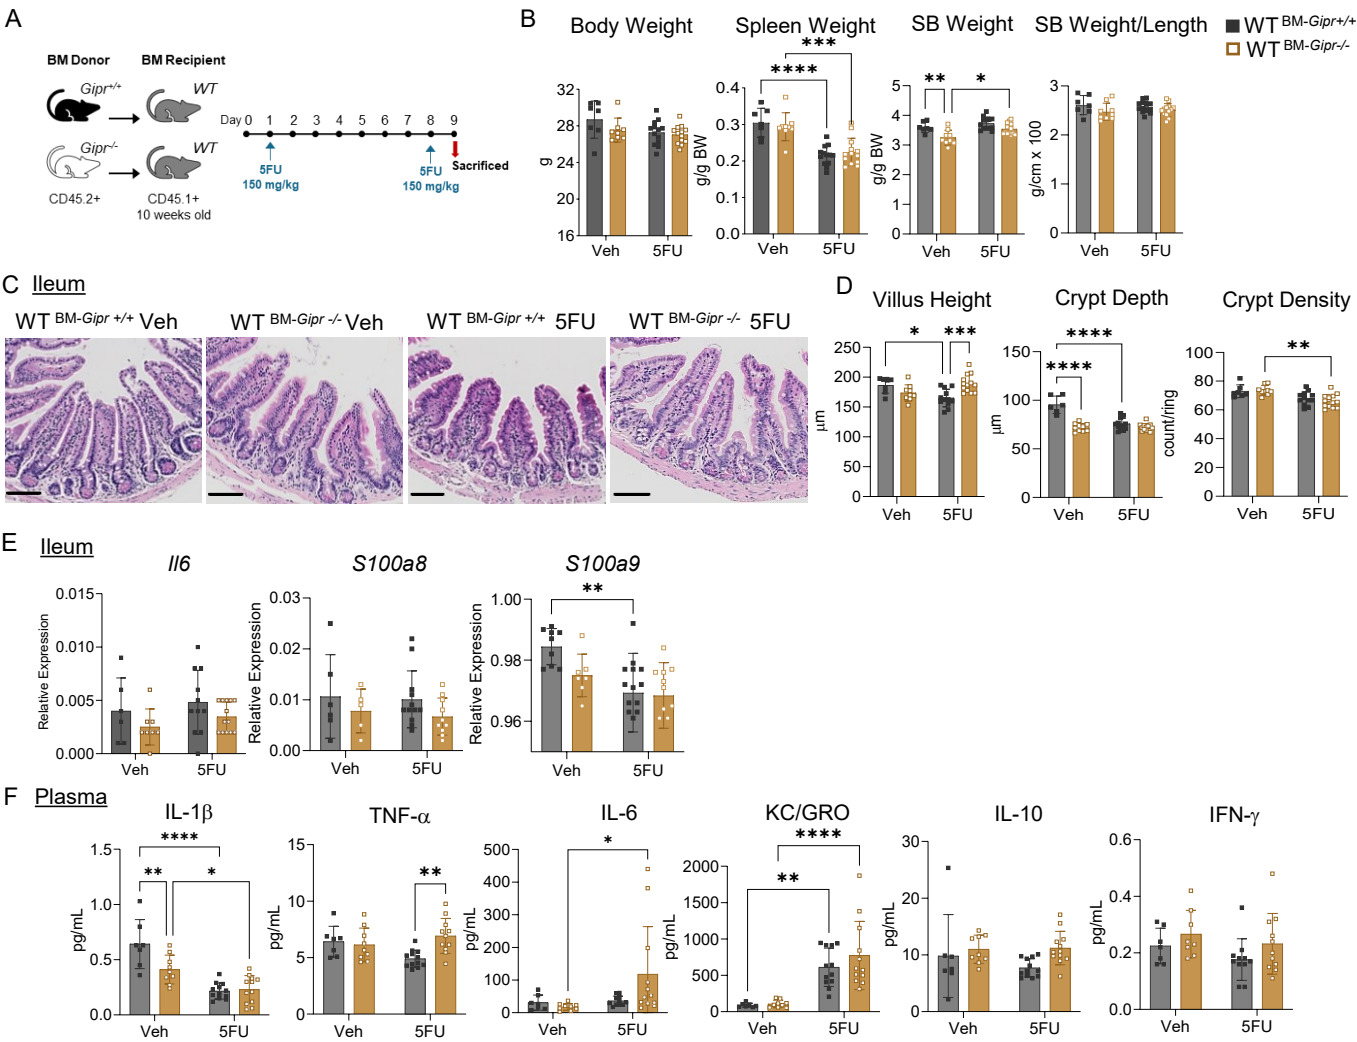

**Supplemental Figure 7: Tissue weights, gut biometry and gene and protein expression of inflammation-related markers in  $WT^{BM-Gipr+/+}$  and  $WT^{BM-Gipr-/-}$  mice with or without 5FU exposure, related to figure 5. (A) Schematic representation of the experimental protocol performed in 4 independent experiments. (B) Body weight, spleen, and small bowel (SB) weights adjusted for total body weight, and SB weight to length ratio of  $WT^{BM-Gipr+/+}$  and  $WT^{BM-Gipr-/-}$  mice with or without 5FU exposure ( $n=7-13$ ). (C) Representative histology images of the ileum using H&E staining at 20x original magnification (20x magnification, scale bar: 100 $\mu$ m). (D) Quantification of villus height, crypt depth and crypt density ( $n=7-13$ ). (E) Ileal gene expression, relative to *Tbp*, of inflammation-related genes ( $n=6-13$ ). (F) Plasma cytokine concentrations ( $n=7-12$ ). Data are presented as the Mean  $\pm$  SD of samples pooled from four independent mouse cohorts. \*  $P \leq 0.05$ , \*\*  $P \leq 0.01$ , \*\*\*  $P \leq 0.001$ , \*\*\*\*  $P \leq 0.0001$  by two-way ANOVA followed by Tukey post-hoc tests. Abbreviations: 5FU: 5-fluorouracil; BM: bone marrow; *Gipr*: glucose-dependent insulinotropic polypeptide receptor; IL-1 $\beta$ : Interleukin-1beta; IL-10: Interleukin-10; *Il6/IL-6*: interleukin-6; KC/GRO: keratinocyte chemoattractant /human growth-regulated oncogene; IFN- $\gamma$ : interferon gamma; SB: small bowel; *S100a8*: S100 calcium-binding protein-8; *S100a9*: S100 calcium-binding protein-9; TNF- $\alpha$ : tumor necrosis factor alpha; Veh: vehicle.**

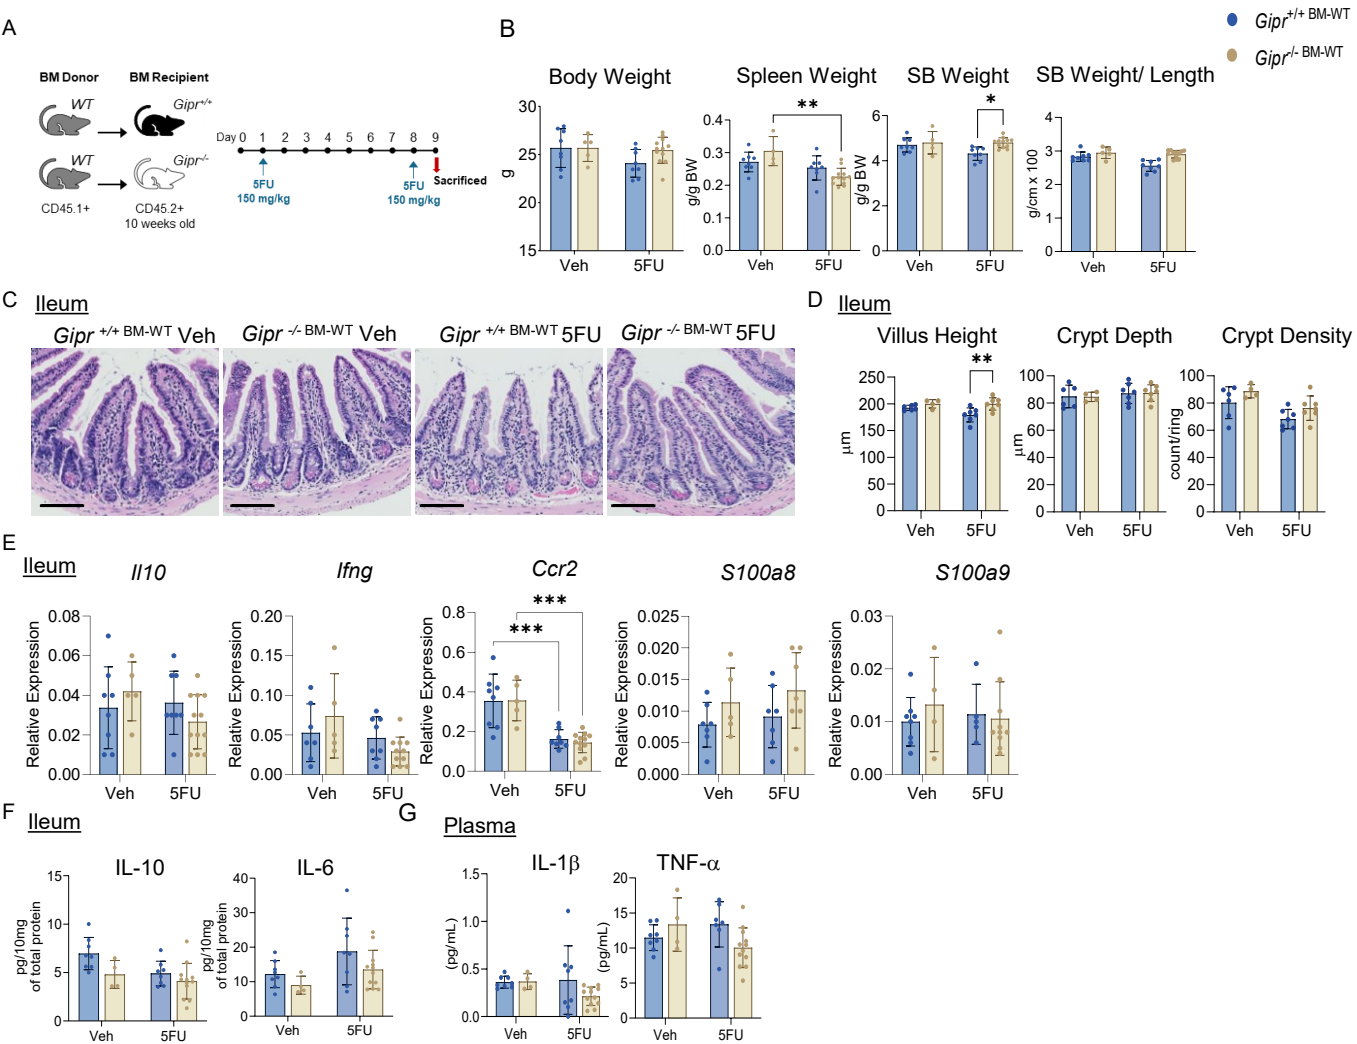

**Supplemental Figure 8: Tissue weights, gut biometry and protein and gene expression of inflammation-related markers in *Gipr*<sup>+/+</sup> BM-WT and *Gipr*<sup>-/-</sup> BM-WT mice with or without 5FU exposure, related to figure 6. (A) Schematic representation of the experimental protocol performed in 3 independent experiments. (B) Body weight, spleen and small bowel (SB) weights adjusted for total body weight, and SB weight to length ratio of *Gipr*<sup>+/+</sup> BM-WT and *Gipr*<sup>-/-</sup> BM-WT mice with or without 5FU exposure (n=4-12). (C) Representative histology images of the ileum using H&E staining at 20x original magnification (20x magnification, scale bar: 100μm). (D) Quantification of villus height, crypt depth and crypt density (n=4-7). (E) Ileal gene expression, relative to *Tbp*, of inflammation-related genes (n=5-12). (F) Ileal and (G) plasma protein cytokine content (n=4-12). Data are presented as the Mean ± SD of samples pooled from three independent mouse cohorts. \* P ≤ 0.05, \*\* P ≤ 0.01, \*\*\* P ≤ 0.001, \*\*\*\* P ≤ 0.0001 by two-way ANOVA followed by Tukey post-hoc tests. Abbreviations: 5FU: 5-fluorouracil; BM: bone marrow; *Ccr2*: c-c chemokine receptor-2; *Gipr*: glucose-dependent insulintropic polypeptide receptor; IL-1β: interleukin-1 beta; *Il10*/IL-10: interleukin-10; IL-6: interleukin-6; *Ifng*: interferon gamma; SB: small bowel; *S100a8*: s100 calcium-binding protein-8; *S100a9*: s100 calcium-binding protein-9; TNF-α: tumor necrosis factor alpha; Veh: vehicle.**

## Mouse Ileum

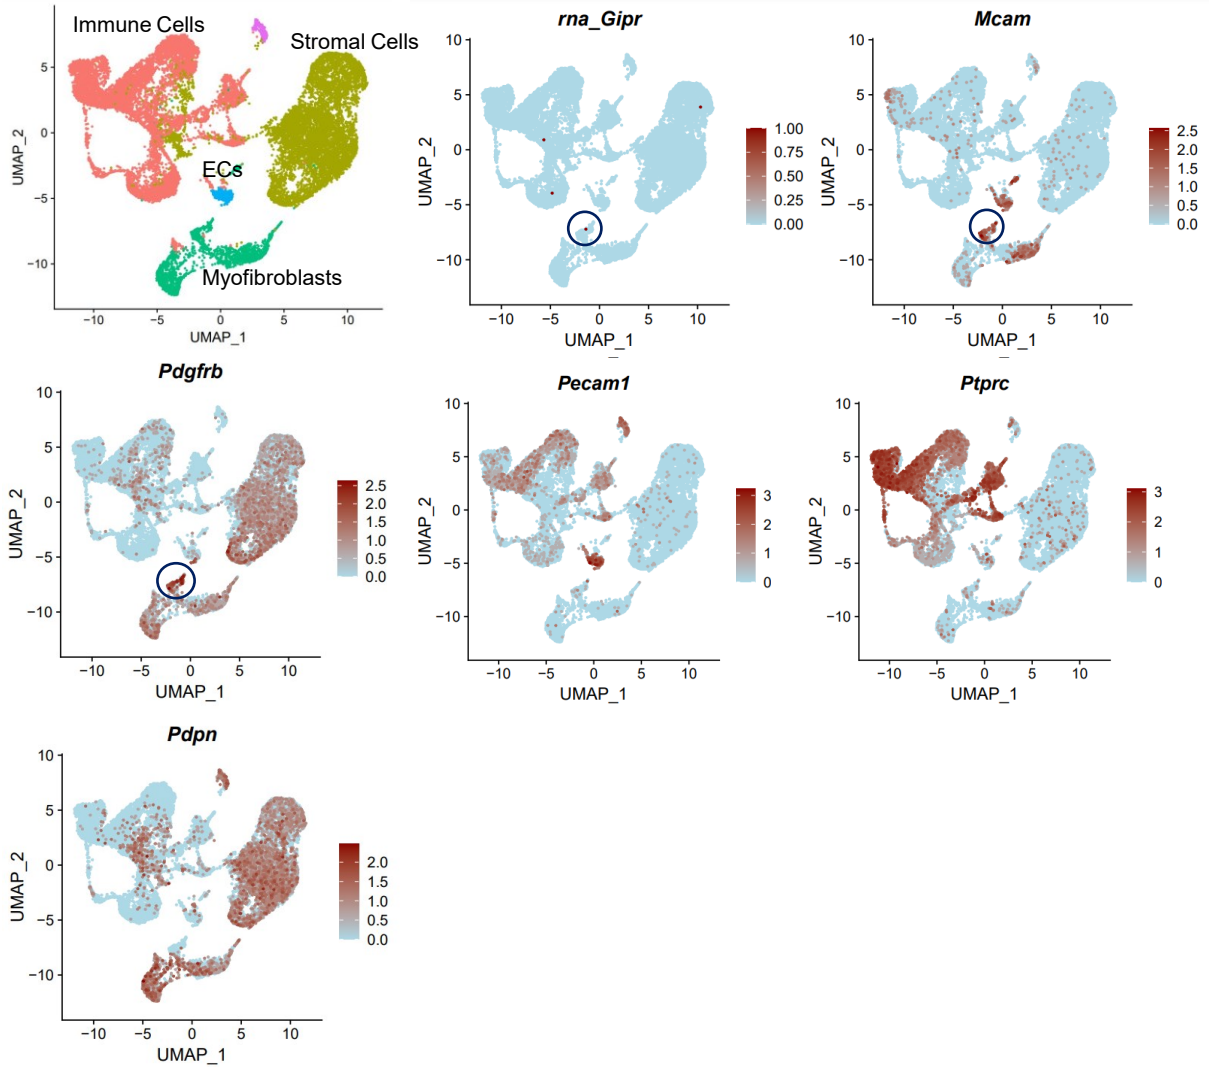

**Supplemental Figure 9: Single-cell RNA-seq data on mouse ileal cells showing *Gipr* expression is not detected in the majority of cells, related to figure 7.** Markers used to define different cell populations include *Mcma* and *Pdgfrb* for pericytes, *Pdpn* for stromal cells, *Pecam1* for endothelial cells, and *Ptprc* for CD45+ cells. Abbreviations: ECs: endothelial cells; *Mcma*: melanoma cell adhesion molecule; *Pdgfrb*: platelet derived growth factor receptor beta; *Pdpn*: podoplanin; *Pecam1*: platelet/endothelial cell adhesion molecule 1; *Ptprc*: protein tyrosine phosphatase receptor type C.

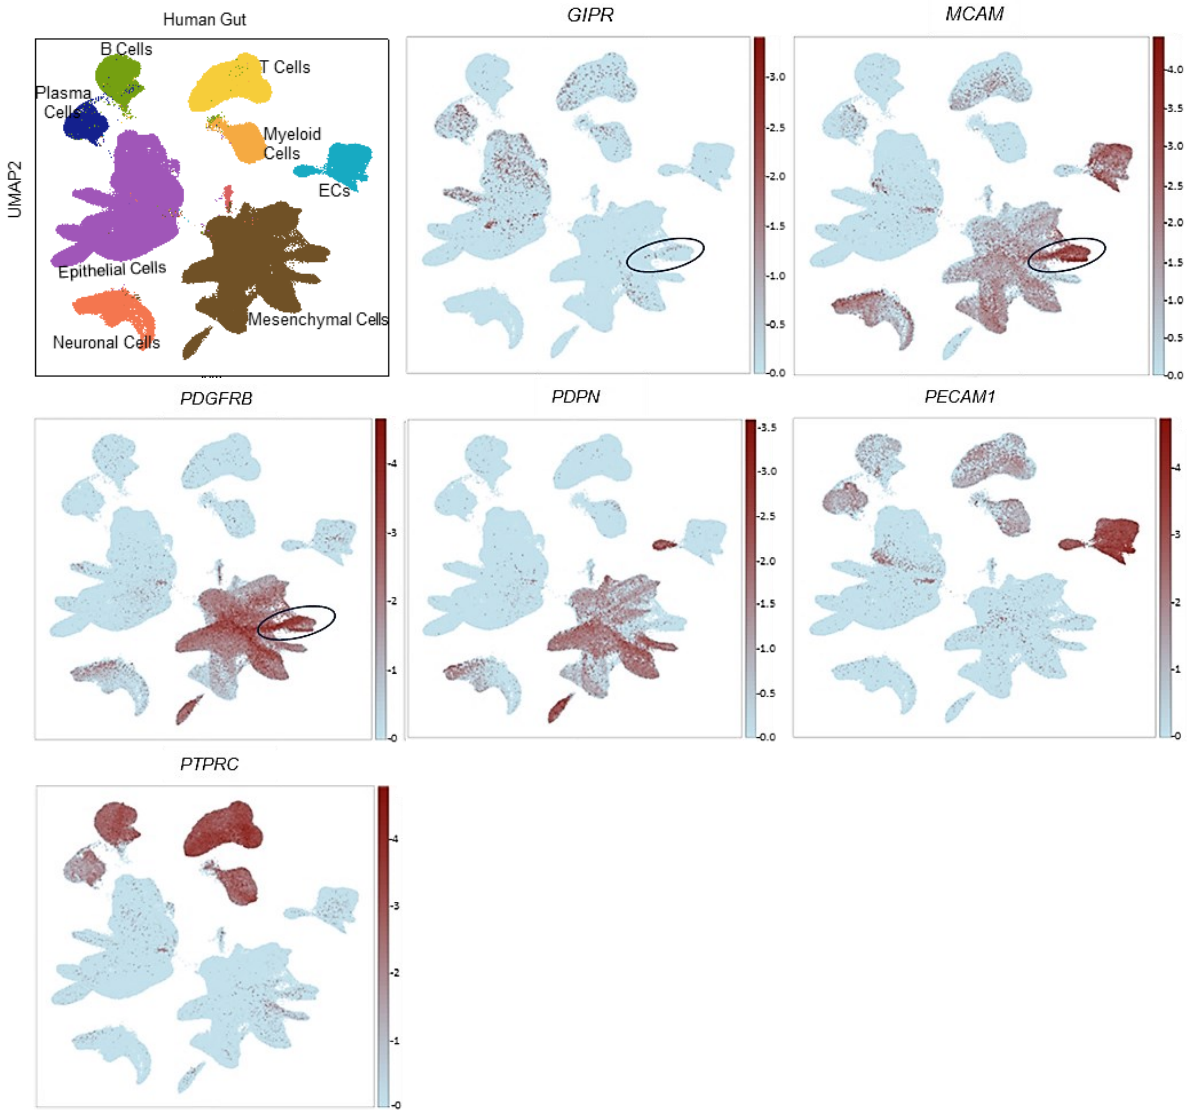

**Supplemental Figure 10 : Single-cell RNA-seq data on human gut cells showing *GIPR* expression in immune cells as well as mesenchymal cells, related to figure 7.** Markers used to define different cell populations include *MCAM* and *PDGFRB* for pericytes, *PDPN* for stromal mesenchymal cells, *PECAM1* for endothelial cells, and *PTPRC* for CD45+ cells. Abbreviations: ECs: endothelial cells; *GIPR*: glucose-dependent insulinotropic polypeptide receptor; *MCAM*: melanoma cell adhesion molecule; *PDGFRB*: Platelet-derived growth factor receptor beta; *PECAM1*: Platelet endothelial cell adhesion molecule-1; *PTPRC*: Protein Tyrosine Phosphatase Receptor Type C.

**Supplemental Table 1: List of primers used in gene expression analysis**

| <b>Gene Symbol</b> | <b>Gene Name</b>                        | <b>Catalog Number</b> |
|--------------------|-----------------------------------------|-----------------------|
| <i>Ccr2</i>        | Chemokine (C-C motif) receptor 2        | Mm01216173_m1         |
| <i>Cxcl1</i>       | Chemokine (C-X-C motif) ligand 1        | Mm04207460_m1         |
| <i>Gip</i>         | Gastric inhibitory polypeptide          | Mm00433601_m1         |
| <i>Gipr</i>        | Gastric inhibitory polypeptide receptor | Mm01316349_g1         |
| <i>Ifng</i>        | Interferon gamma                        | Mm01168134_m1         |
| <i>Il10</i>        | Interleukin 10                          | Mm01288386_m1         |
| <i>Il1b</i>        | Interleukin 1 beta                      | Mm01336189_m1         |
| <i>Il6</i>         | Interleukin 6                           | Mm00446190_m1         |
| <i>S100a8</i>      | S100 calcium binding protein A8         | Mm00496696_g1         |
| <i>S100a9</i>      | S100 calcium binding protein A9         | Mm00656925_m1         |
| <i>Tnf</i>         | Tumor necrosis factor alpha             | Mm00443258_m1         |
| <i>Ly6g</i>        | Lymphocyte antigen 6 complex, locus G   | Mm04934123_m1         |
| <i>Adgre1</i>      | Adhesion G protein-coupled receptor E1  | Mm00802529_m1         |
| <i>Cd68</i>        | Cluster of differentiation 68           | Mm03047343_m1         |
| <i>Tbp</i>         | TATA box binding protein                | Mm00446973_m1         |
| <i>Ppia</i>        | Cyclophilin                             | Mm02342430_g1         |
| <i>Rpl32</i>       | Ribosomal protein L32                   | Mm02528467_g1         |
